# Supplementary material
Source: PubMed Central journal article supplement (PMC9346605)
Supplement: NIHMS1825947-supplement-1.pdf [file NIHMS1825947-supplement-1.pdf]

**Supplementary Table:**

**Table A: Bivariate and Multivariate Regressions of Avoidant Coping to General Stress and Discrimination on Hypertension Stratified by Race (Complete Case Sample)**

| <b>Model</b>                                         | <b>White (n=239)</b> | <b>African American (n=175)</b> |
|------------------------------------------------------|----------------------|---------------------------------|
| <b>Avoidant Coping in response to General Stress</b> |                      |                                 |
| <b>Model 1<sup>a</sup></b>                           | 1.57 [0.85, 2.88]    | 0.99 [0.75, 1.33]               |
| <b>Model 2<sup>b</sup></b>                           | 1.62 [0.87, 3.01]    | 0.93 [0.68, 1.26]               |
| <b>Model 3<sup>c</sup></b>                           | 1.66 [0.89, 3.09]    | 0.87 [0.65, 1.17]               |
| <b>Model 4<sup>d</sup></b>                           | 1.63 [0.89, 2.98]    | 0.88 [0.67, 1.16]               |
| <b>Avoidant Coping in response to Discrimination</b> |                      |                                 |
| <b>Model 5<sup>e</sup></b>                           | 1.98 [1.18, 3.33]    | 1.02 [0.75, 1.39]               |
| <b>Model 6<sup>f</sup></b>                           | 2.13 [1.23, 3.68]    | 0.98 [0.71, 1.36]               |
| <b>Model 7<sup>g</sup></b>                           | 1.86 [1.07, 3.21]    | 1.00 [0.72, 1.39]               |
| <b>Model 8<sup>h</sup></b>                           | 1.84 [1.06, 3.22]    | 0.99 [0.74, 1.31]               |

<sup>a</sup>Model 1 is unadjusted

<sup>b</sup>Model 2 is adjusted for adult SES and gender

<sup>c</sup>Model 3 is adjusted for adult SES, gender, and chronic stressor exposure

<sup>d</sup>Model 4 is adjusted for adult SES, gender, chronic stressor exposure, and obesity status

<sup>e</sup>Model 5 is unadjusted

<sup>f</sup>Model 6 is adjusted for adult SES and gender

<sup>g</sup>Model 7 is adjusted for adult SES, gender, and daily discrimination

<sup>h</sup>Model 8 is adjusted for adult SES, gender, daily discrimination, and obesity status
